# Supplementary material for: The DEXD/H-box RNA Helicase DDX19 Is Regulated by an α-Helical Switch
Source: PubMed Central journal article supplement — J Biol Chem. 2009 Apr 17;284(16):10296–300. doi: 10.1074/jbc.C900018200 (PMC2667716; doi:10.1074/jbc.c900018200), 2009-04-17
Supplement: C900018200_1.pdf [file C900018200_1.pdf]

**Supplemental material accompanying**

**THE DEXD/H-BOX RNA HELICASE DDX19 IS REGULATED BY AN  $\alpha$ -HELICAL SWITCH**

**Ruairi Collins, Tobias Karlberg, Lari Lehtiö, Patrick Schütz, Susanne van den Berg, Lars-Göran Dahlgren, Martin Hammarström, Johan Weigelt & Herwig Schüler**

From the Structural Genomics Consortium, Department of Medical Biochemistry and Biophysics, Karolinska Institute, S-17177 Stockholm, Sweden.

**TABLE S1. DDX19 crystal structures: Data collection and refinement statistics.**

Values for the highest resolution shell are shown in parentheses.

| Structure                                 | apo enzyme           | RNA complex                                   |
|-------------------------------------------|----------------------|-----------------------------------------------|
| Ligand                                    | ADP                  | ADPNP                                         |
| PDB entry                                 | 3EWS                 | 3G0H                                          |
| Beamline                                  | BL14-2               | ID-29                                         |
| Wavelength (Å)                            | 0.91841              | 0.97931                                       |
| Space group                               | P2 <sub>1</sub>      | P2 <sub>1</sub> 2 <sub>1</sub> 2 <sub>1</sub> |
| Cell dimensions                           |                      |                                               |
| <i>a</i> , <i>b</i> , <i>c</i> (Å)        | 81.6, 47.6, 124.7    | 41.6, 81.1, 124.7                             |
| β (°)                                     | 90.0, 95.4, 90.0     | 90.0, 90.0, 90.0                              |
| Resolution (Å)                            | 20.0 - 2.7 (2.8-2.7) | 30.0-2.7 (2.8-2.7)                            |
| R <sub>merge</sub> §                      | 0.067 (0.40)         | 0.145 (0.55)                                  |
| I / (σI)                                  | 14.5 (4.3)           | 9.1 (2.5)                                     |
| Completeness (%)                          | 99.1 (99.5)          | 99.3 (99.7)                                   |
| Redundancy                                | 4.7 (4.9)            | 3.3 (3.2)                                     |
| <b>Refinement</b>                         |                      |                                               |
| Resolution (Å)                            | 19.9 – 2.7           | 29.6 – 2.7                                    |
| R <sub>work</sub> † / R <sub>free</sub> ‡ | 0.188/0.260          | 0.220/0.275                                   |
| No. atoms                                 |                      |                                               |
| Protein                                   | 6428                 | 3225                                          |
| Ligands                                   | 54                   | 163                                           |
| Water                                     | 26                   | -                                             |
| <i>B</i> -factors (Å <sup>2</sup> )       |                      |                                               |
| Protein                                   | 70.0                 | 13.8                                          |
| Ligands                                   | 46.5                 | 26.5                                          |
| Water                                     | 42.8                 | -                                             |
| R.m.s deviations                          |                      |                                               |
| Bond lengths (Å)                          | 0.004                | 0.007                                         |
| Bond angles (°)                           | 0.77                 | 1.1                                           |
| Ramachandran plot                         |                      |                                               |
| Favored (%)                               | 96                   | 96.8                                          |
| Additionally allowed (%)                  | 4                    | 3.2                                           |

§ R<sub>merge</sub> =  $\sum_i |I_i - \langle I \rangle| / \sum \langle I \rangle$ , where *I* is an individual intensity measurement and  $\langle I \rangle$  is the average intensity for this reflection with summation over all data.

† R<sub>work</sub> is defined as  $\sum ||F_{obs} - F_{calc}|| / \sum |F_{obs}|$ , where *F*<sub>obs</sub> and *F*<sub>calc</sub> are observed and calculated structure-factor amplitudes, respectively.

‡ R<sub>free</sub> is the R factor for the test set (5-10 % of the data).

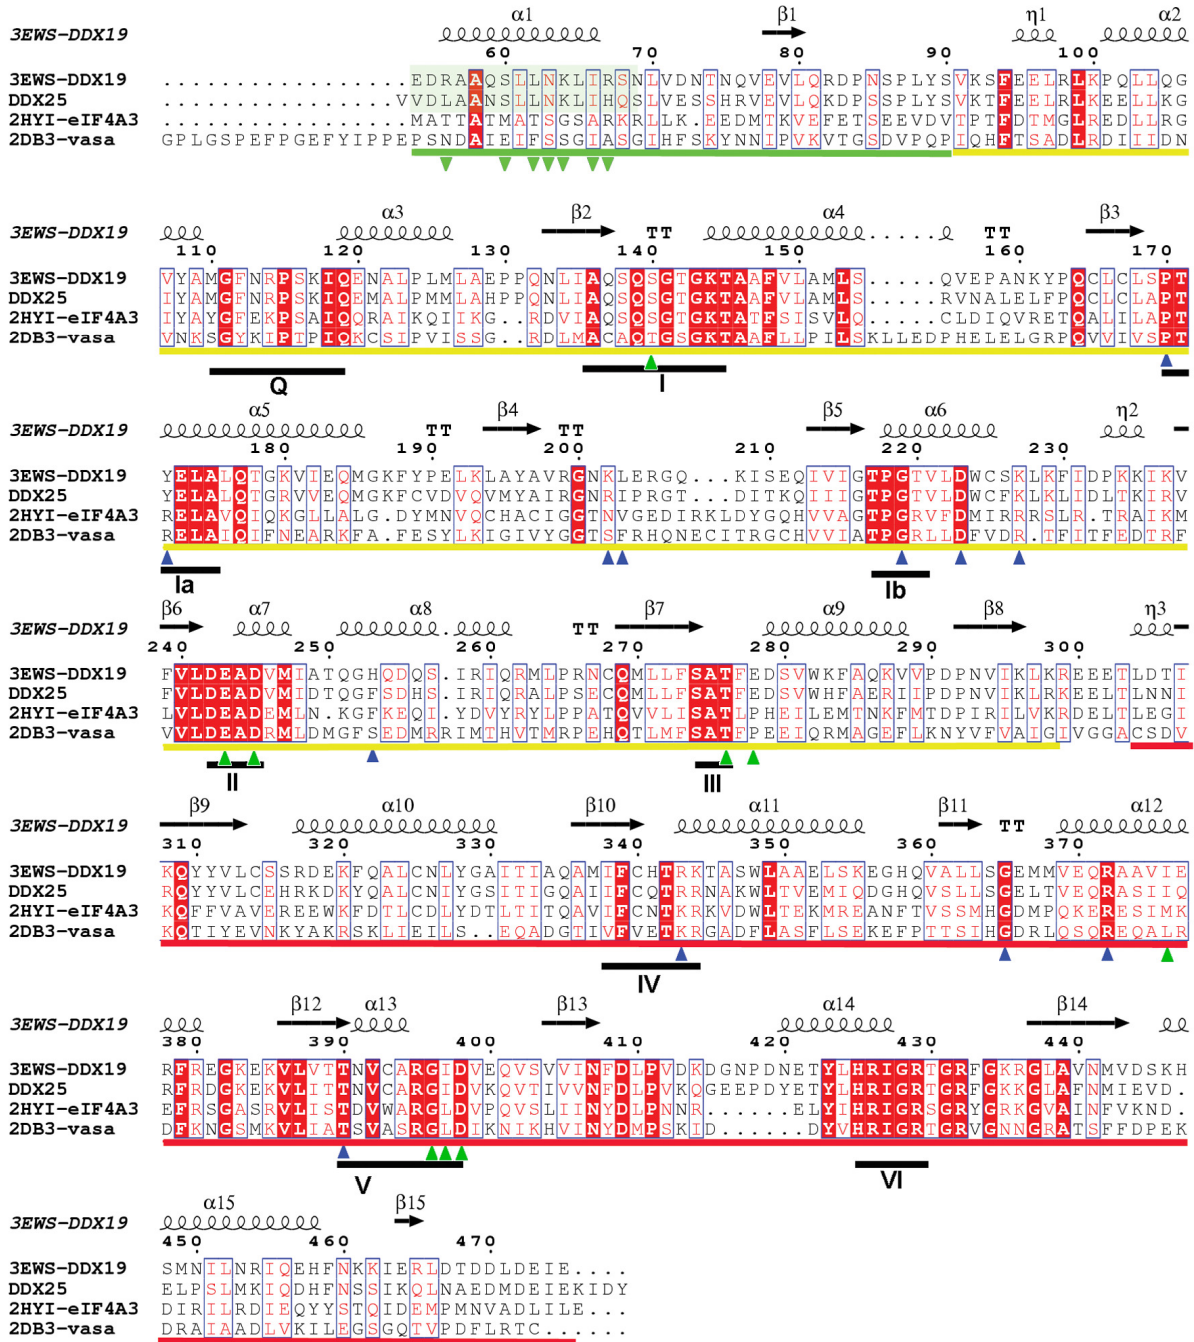

**FIGURE S1. Comparison of DDX19 with other DEAD-box helicases.** Sequence alignment of human DDX19, DDX25, DDX48, and *Drosophila* Vasa. The conserved domains and motifs are indicated below the alignment (1). The cleft insertion helix  $\alpha 1$  is emphasized in light green. Residues that interact with the cleft-inserted helix are indicated by green upward arrowheads, and helix  $\alpha 1$  residues that interact with those residues in other parts of the protein are indicated by green downward arrowheads. RNA interacting residues are indicated by blue arrowheads.

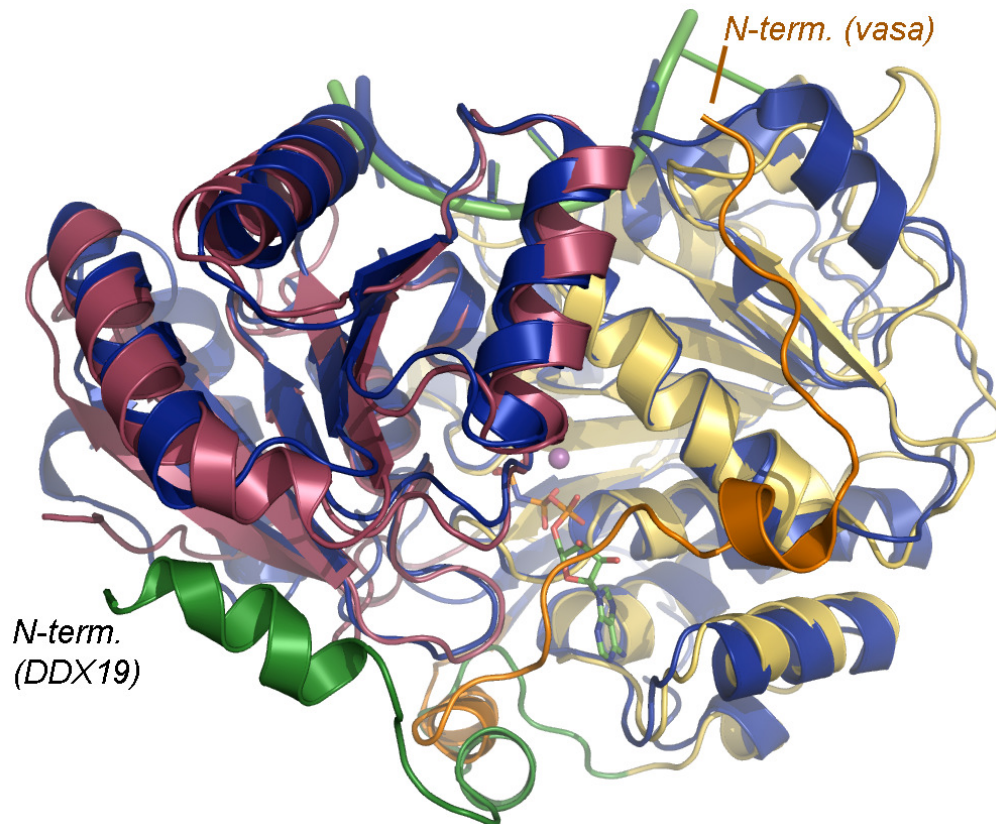

**FIGURE S2. Superposition of the DDX19 (pdb entry 3G0H) and Vasa RNA complexes (2DB3).** DDX19 is shown in red (conserved domain-1) and yellow (conserved domain-2) with the poly(U) ssRNA in green and the N-terminal helix (indicated) in green. Vasa is shown in blue, with the poly(U) ssRNA in blue and the N-terminal helix (indicated) in gold.

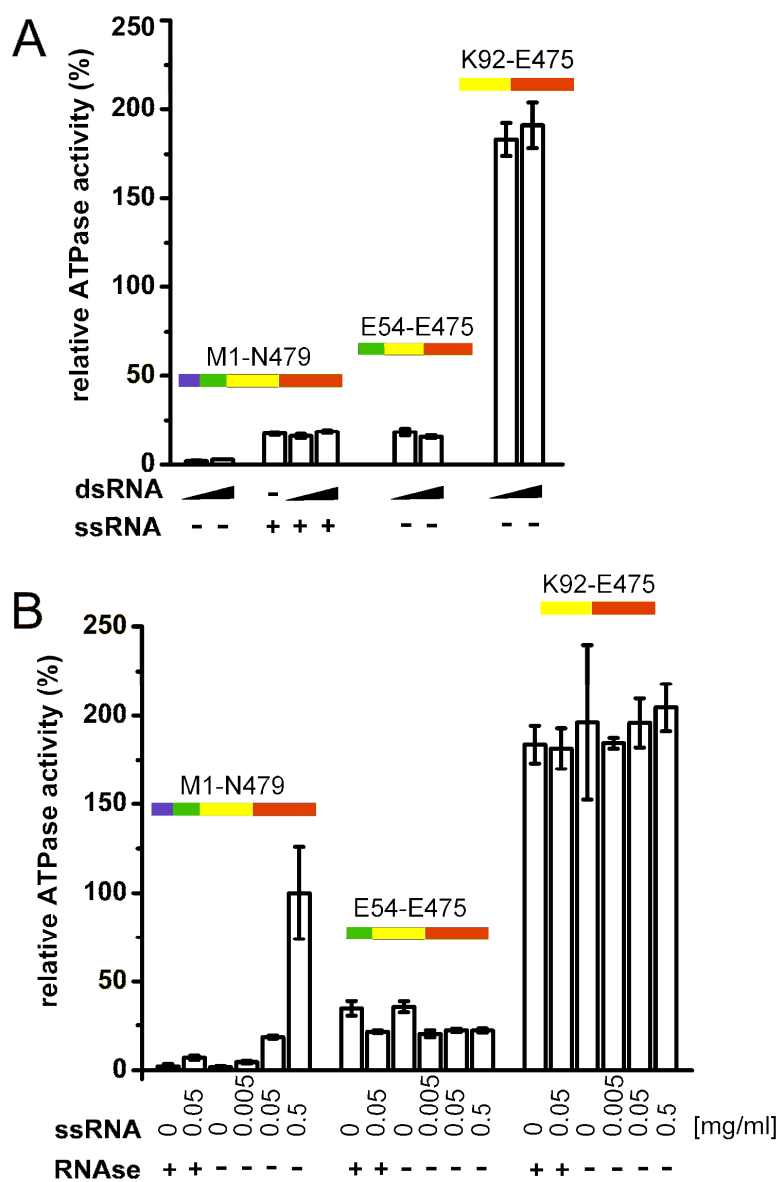

**FIGURE S3. ATPase activities of DDX19 proteins used in this study.** *A*, influence of double stranded RNA on the ATPase rates of DDX19. Left, full-length protein: Rates measured (from left to right) with 0.05 and 0.5 mg/ml dsRNA, and in the simultaneous presence of 0.05 mg/ml ssRNA and 0, 0.005 and 0.5 mg/ml dsRNA. Center, E<sup>54</sup> – E<sup>475</sup>: Rates measured (from left to right) with 0.05 and 0.5 mg/ml dsRNA. Right, K<sup>92</sup> – E<sup>475</sup>: Rates measured (from left to right) with 0.05 and 0.5 mg/ml dsRNA *B*, ATPase rates in the presence of varying amounts of ssRNA. Results are those shown in Fig. 2*B* of the main text, but with the addition of RNase-treated controls. The concentration of ssRNA present is indicated for each column. As in the main text, all activities are relative to the value measured for full-length DDX19 in the presence of 0.5 mg/ml ssRNA (0.77 ± 0.2 min<sup>-1</sup>).

## References

1. Cordin, O., Banroques, J., Tanner, N. K., and Linder, P. (2006) *Gene* **367**, 17-37
